# Supplementary material for: Breast cancer and its determinants in Ethiopia: a systematic review and meta-analysis
Source: HighWire-hosted journal article supplement (doi:10.1136/bmjopen-2023-080080), 2024-11-01
Supplement: bmjopen-2023-080080supp002_data_supplement.pdf [file bmjopen-2023-080080supp002_data_supplement.pdf]

Search strategy

**PubMed:**

["breast" OR "mammary gland"]

AND

["Cancer" OR "tumor" OR "malignancy" OR "breast cancer" OR "breast malignancy" OR "breast tumor"]

AND

["Risk factors" OR "Associated factors" OR "Determinants" OR "predictors"]

AND

["Ethiopia" OR "Addis Ababa" OR "Northern Ethiopia" OR "North west Ethiopia" OR "Southern Ethiopia" OR "South Western Ethiopia" OR "Western Ethiopia" OR "East Ethiopia"]

**HINARI:**

[Breast cancer OR breast malignancy OR Breast carcinoma]

AND

[Determinants OR Associated factors OR Predictors]

AND

[Ethiopia]

**Science Direct:**

[Breast cancer] OR breast malignancy OR Breast carcinoma]

AND

[Determinants OR Associated factors]

**Google and Google Scholar:**

[Prevalence OR Magnitude OR Proportion]

AND

[Breast cancer OR breast malignancy OR Breast carcinoma]

AND

[Associated factors OR Determinants OR Risk factors OR Predictors OR factors OR Causes]

AND

[Ethiopia]

**University websites:**

[Breast cancer OR breast malignancy OR Breast carcinoma]

AND

[Associated factors of breast cancer OR Risk factors of breast cancer OR Predictors of breast cancer OR factors OR Causes of breast cancer]

AND

Ethiopia OR Western Ethiopia OR Central Ethiopia OR Addis Ababa OR northern Ethiopia OR Eastern Ethiopia OR Southern Ethiopia]
