# Supplementary material for: Breast cancer and its determinants in Ethiopia: a systematic review and meta-analysis
Source: HighWire-hosted journal article supplement (doi:10.1136/bmjopen-2023-080080), 2024-11-01
Supplement: bmjopen-2023-080080supp006_data_supplement.pdf [file bmjopen-2023-080080supp006_data_supplement.pdf]

by population

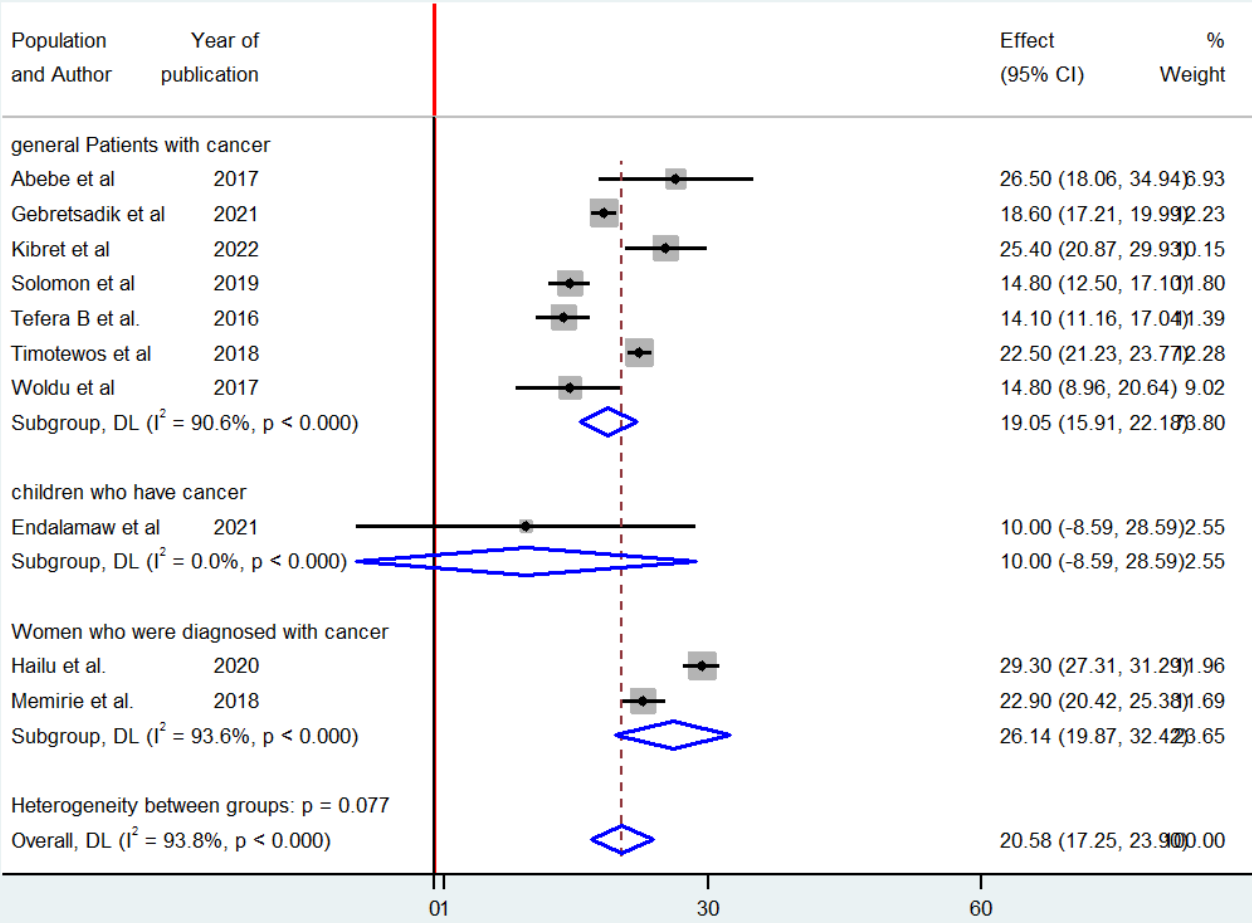

NOTE: Weights and between-subgroup heterogeneity test are from random-effects model
