# Supplementary figures and images for: Breast cancer and its determinants in Ethiopia: a systematic review and meta-analysis
Source: HighWire-hosted journal article supplement (doi:10.1136/bmjopen-2023-080080), 2024-11-01

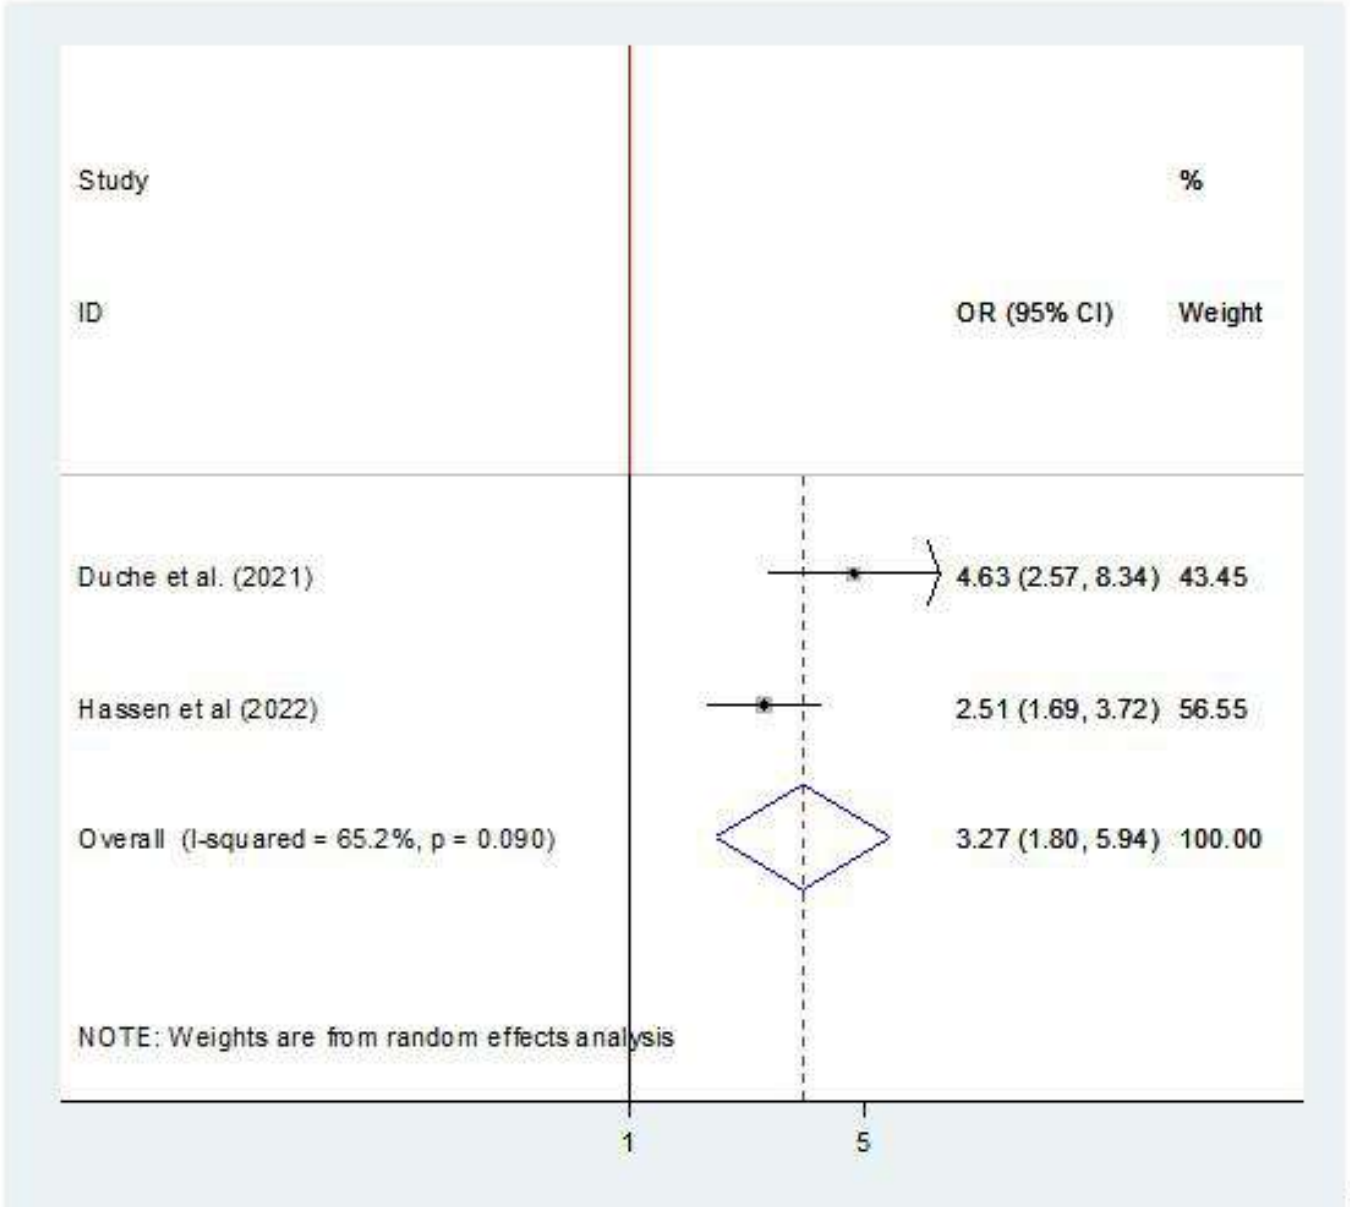

Supplement: bmjopen-2023-080080supp011_data_supplement.pdf [file bmjopen-2023-080080supp011_data_supplement.pdf]

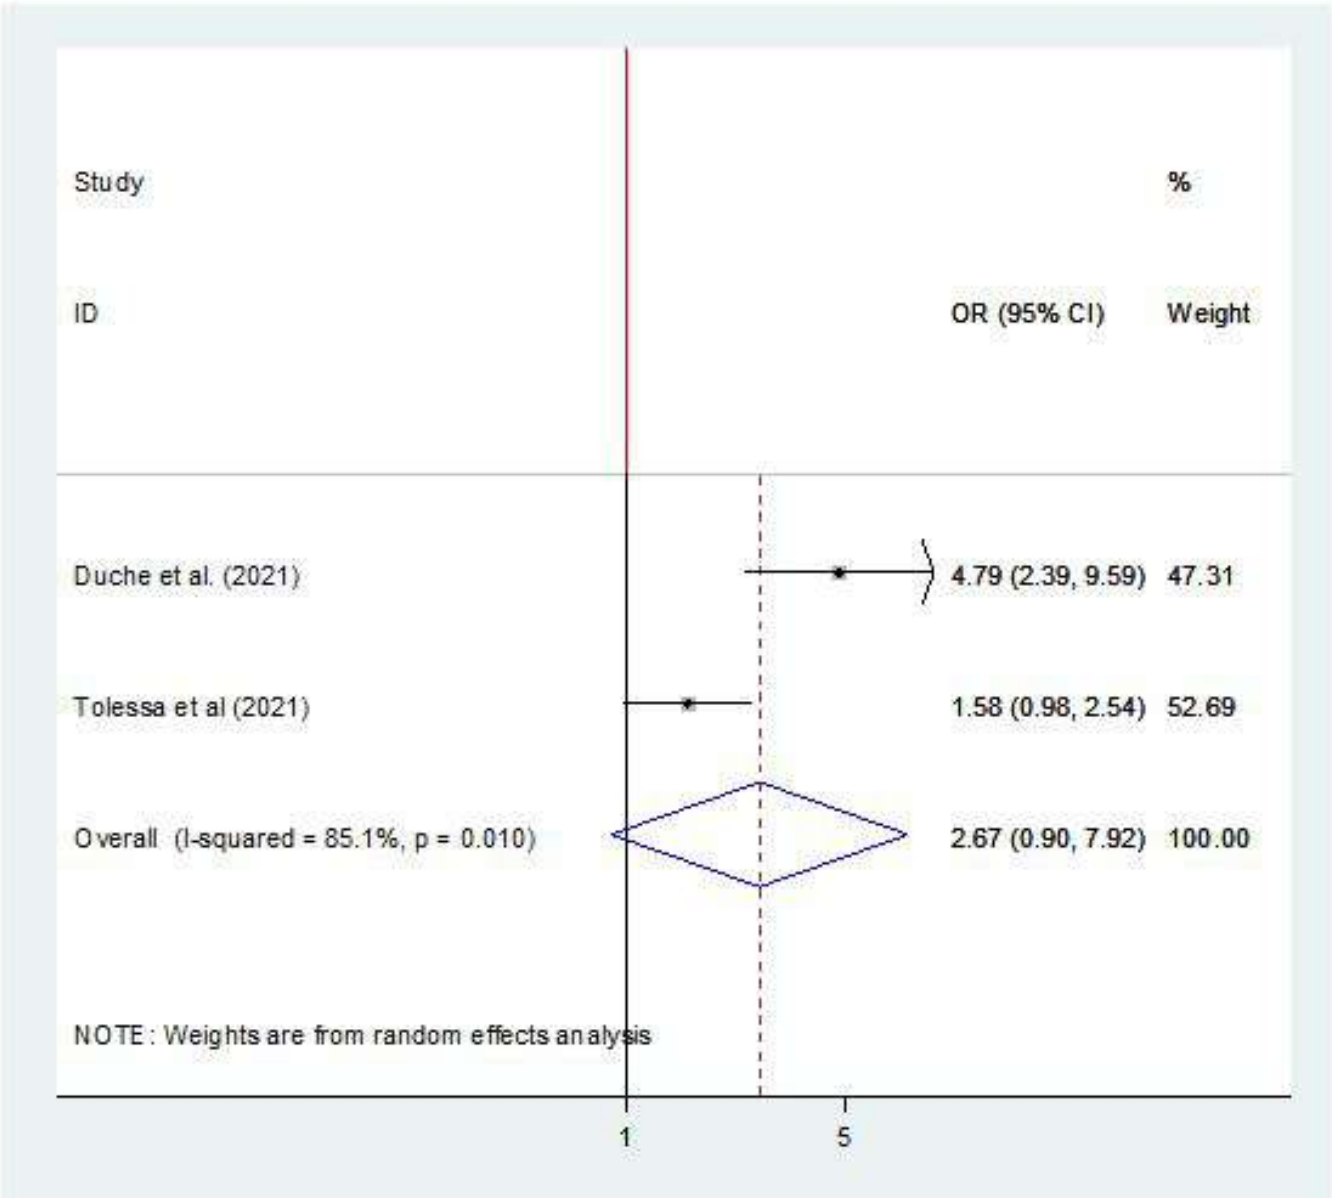

Supplement: bmjopen-2023-080080supp014_data_supplement.pdf [file bmjopen-2023-080080supp014_data_supplement.pdf]
